# Supplementary material
Source: Springer Nature journal article supplement (https://www.springerprofessional.de/resource/supplementary/13688_2012_9_MOESM12_ESM.pdf/11893932)

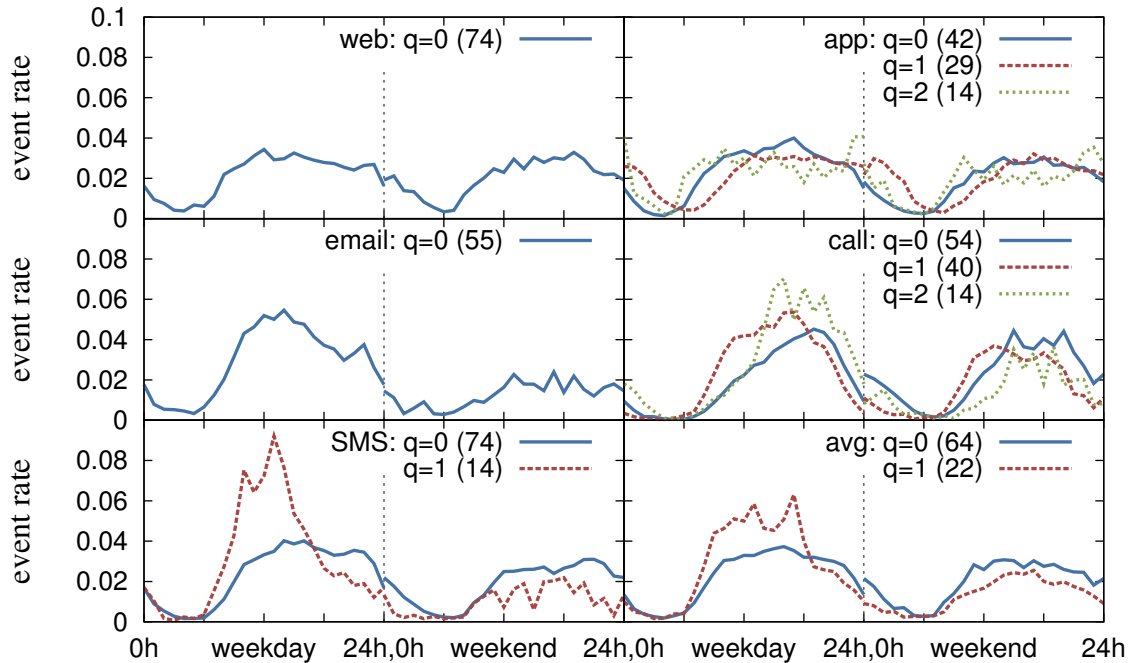

Supplement: MOESM12 [file 11893932]
